# Supplementary material for: Lithium-preserved sintering method for perovskite-based solid electrolyte thin films via flash light sintering for all-solid-state lithium-ion batteries
Source: Royal Society of Chemistry journal article supplement (doi:10.1039/d3ta03685e), 2023-01-01
Supplement: d3ta03685e1.pdf [file d3ta03685e1.pdf]

Supplementary Information of

**Lithium-preserved Sintering Method for  
Perovskite-based Solid Electrolyte Thin Films  
via Flash Light Sintering for All-solid-state  
Lithium-ion Batteries**

*Sunmin Kim<sup>a</sup>, Hojae Lee<sup>a</sup>, Junghum Park<sup>a</sup>, Miju Ku<sup>a</sup>, Minji Kim<sup>a</sup>, and Young-Beom Kim<sup>a,b,\*</sup>*

<sup>a</sup> Department of Mechanical Convergence Engineering, Hanyang University, 222 Wangsimni-ro, Seongdong-gu, Seoul, 04763, Republic of Korea

<sup>b</sup> Institute of Nano Science and Technology, Hanyang University, 222 Wangsimni-ro, Seongdong-gu, Seoul, 04763, Republic of Korea

**\* Corresponding Author**

E-mail: [ybkim@hanyang.ac.kr](mailto:ybkim@hanyang.ac.kr)

Tel: +82-2-2220-0544

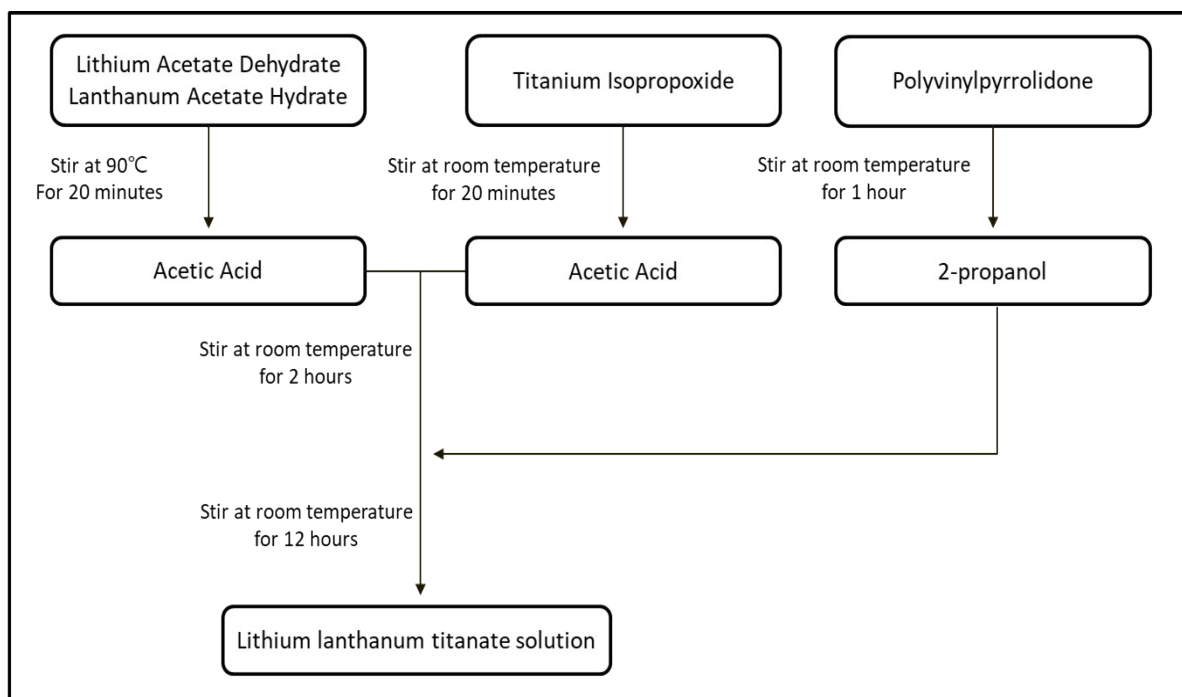

**Fig. S1** Procedure for the fabrication of lithium lanthanum titanate sol in acetate-alkoxide route.

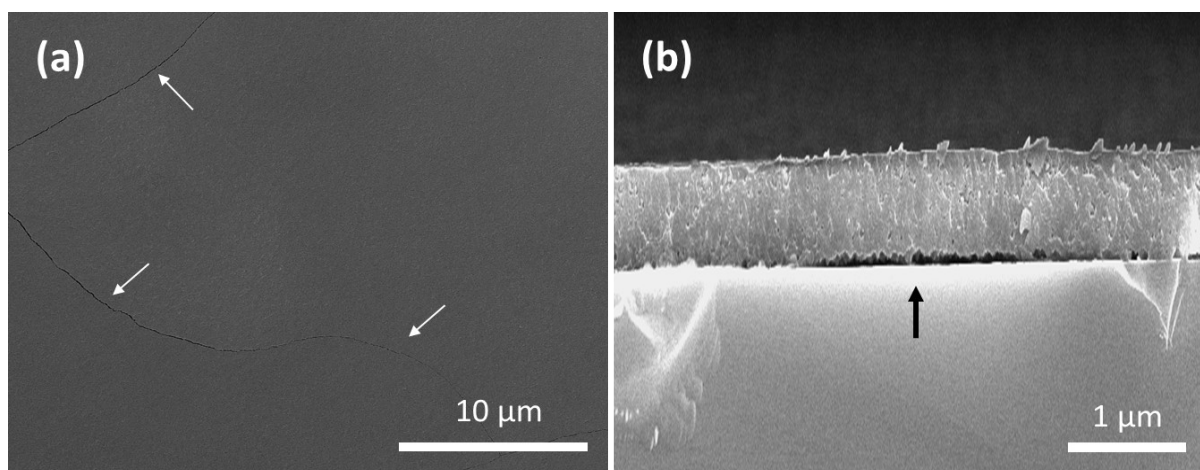

**Fig. S2** (a) Surface morphologies and (b) cross-sections of flash-light sintered LLTO thin film under 650 V without hot plate. The white arrows are pointing at the cracks on the surface of the thin film. The black arrow is pointing at the delamination spot.

**Table S1** ICP-OES result for molar ratios of lithium, lanthanum, and titanium in thermal sintered thin film at 1100 °C.

| Sintering Condition          | Molar ratio of Li:La:Ti in starting solution | Molar ratio of Li:La:Ti after sintering |
|------------------------------|----------------------------------------------|-----------------------------------------|
| Thermal Sintering at 1100 °C | 0.34 : 0.56 : 1                              | 0.20 : 0.55 : 1                         |

### LLTO thin-film sintered at 1100 °C

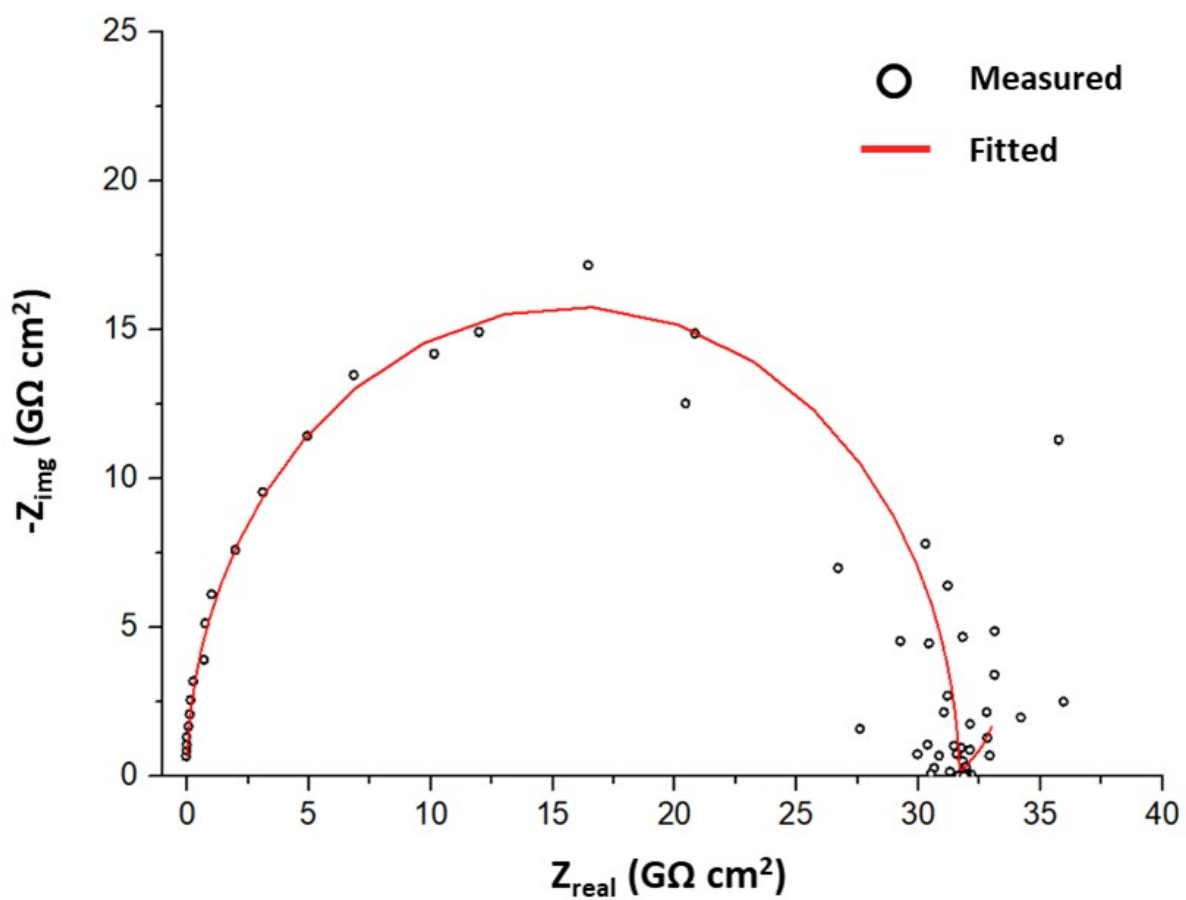

**Fig. S3** Nyquist plot of the LLTO thin film thermally sintered at 1100 °C.

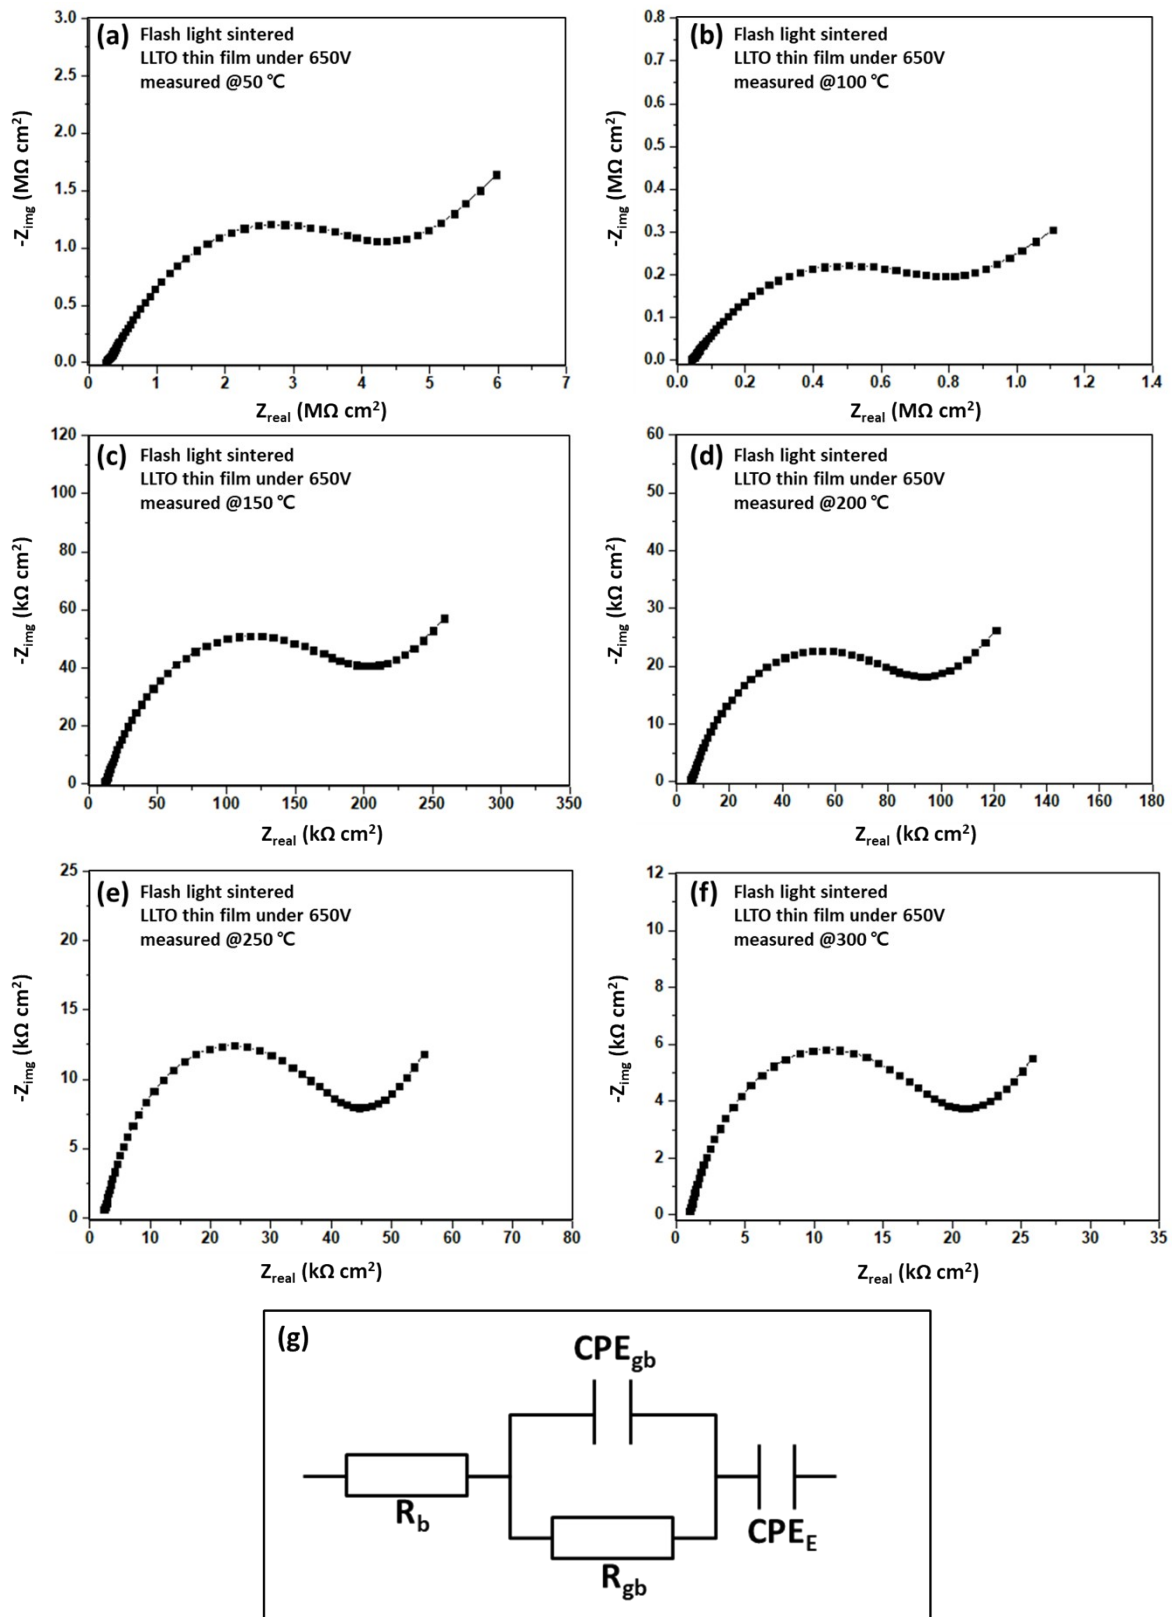

**Fig. S4** Nyquist plot of flash light sintered LLTO thin film under 650V measured at (a) 50 °C (b) 100 °C (c) 150 °C (d) 200 °C (e) 250 °C (f) 300 °C and the data is fitted based on the corresponding (g) electrical circuit.

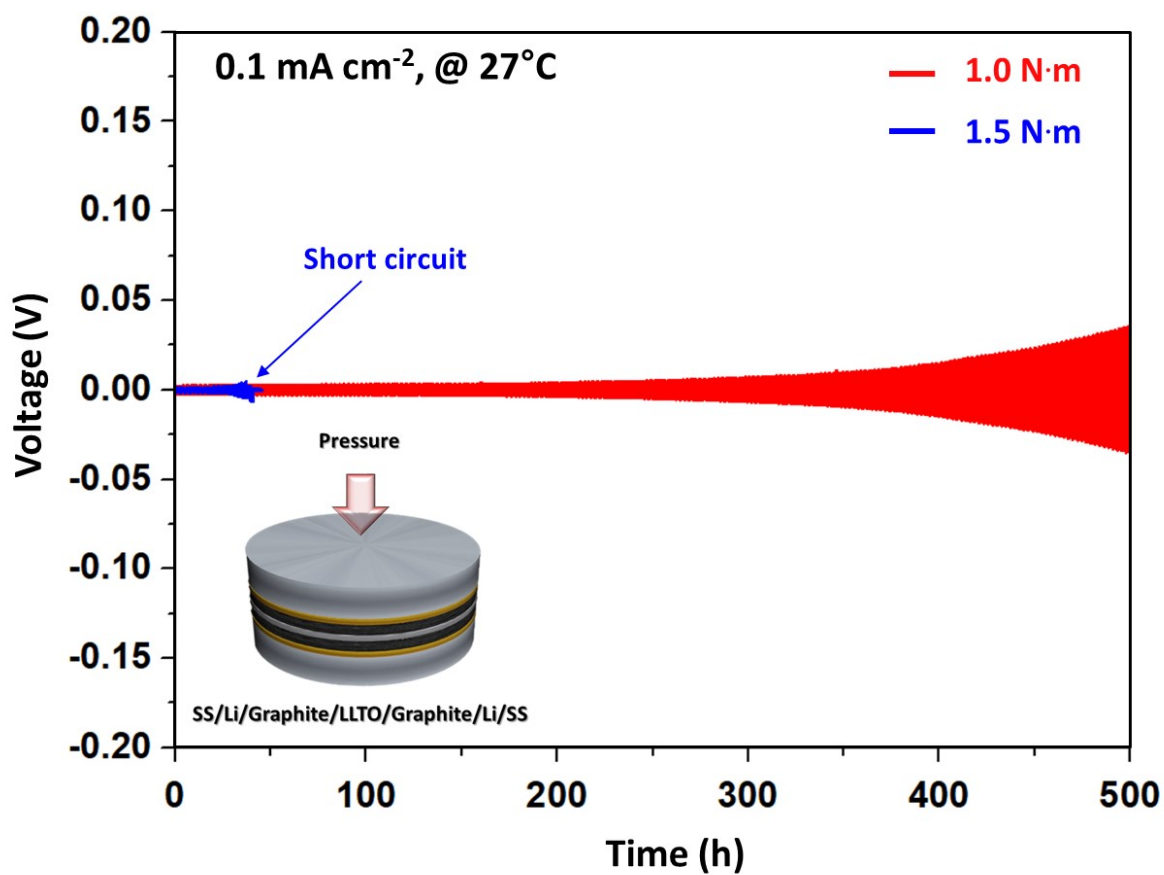

**Fig. S5** Galvanostatic cycle performance of symmetric cell with flash-light sintered LLTO thin film under 650V as solid electrolyte under torques of 1.0 N·m and 1.5 N·m
